# Supplementary material
Source: Elsevier journal article supplement (https://www.sciencedirect.com/science/article/pii/S2529984019300059)
Supplement: mmc2 [file S2529984019300059:mmc2.docx]

**Anexo 2:** Ventiladores e interfaces utilizados en cada unidad de estudio.

|  | | **UCI quirúrgica** | **UCI polivalente** | | | **Unidades cuidados intermedios** | | | **Salas** |
| --- | --- | --- | --- | --- | --- | --- | --- | --- | --- |
| Hospital 1 | Hospital 2 | Hospital 3 | Hospital 4 | Reanimación  Hospital 2 | Urgencias  Hospital 3 | Urgencias  Hospital 4 | Hospital 4 |
| Ventilador convencional de UCI con módulo VNI | Puritan Bennett 840® | X | X | X | X |  | X |  |  |
| Servo’s® | X |  |  |  |  |  |  |  |
| Galileo® | X |  |  |  |  |  |  |  |
| Evita 4® |  | X |  | X |  |  |  |  |
| Ventilador específico de VNI | BiPap® Vision® |  | X |  | X |  | X | x | x |
| BiPap®Synchrony® |  |  |  |  |  |  | x | x |
| V60® |  |  |  |  | X |  |  |  |
| Interfaz | Máscara oronasal * | X | X | x | x | x | X | x | x |
| Máscara facial** |  | X |  |  |  |  |  |  |

Abreviaturas: UCI: unidad de cuidados intensivos; VNI: ventilación mecánica no invasiva

* Máscara oronasal o buconasal: cubre nariz y boca

**Máscara facial: cubre nariz, boca y ojos

Puritan Bennett 840, Covidien, Mansfield, MA, USA

Servo-s, Maquet Critical Care, Solna, Sweden

Galileo, Hamilton Medical, Bonaduz, Switzerland

Evita 4, Dräger Medical, Lübeck, Germany

BiPap® Vision®, Philips, Respironics Inc, MA, USA

V60, Respironics Inc, MA, USA

BiPap® Synchrony®, Respironics, PA, USA
